# Supplementary material for: Vedolizumab for perianal fistulizing Crohn’s disease: systematic review and meta-analysis
Source: PubMed Central journal article supplement — Intest Res. 2022 Feb 8;20(2):240–50. doi: 10.5217/ir.2021.00091 (PMC9081994; doi:10.5217/ir.2021.00091), 2022-02-08
Supplement: ir-2021-00091-suppl3.pdf [file ir-2021-00091-suppl3.pdf]

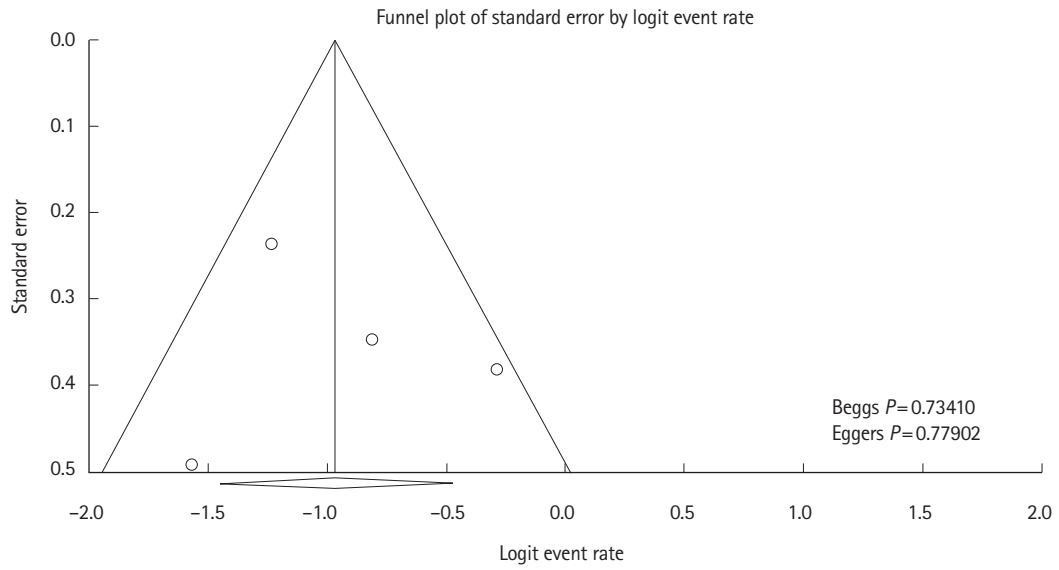

**Supplementary Fig. 1.** Funnel plot for included studies reporting complete healing of perianal fistulizing disease.
